# Supplementary material for: Structures of the sulfite detoxifying F420-dependent enzyme from Methanococcales
Source: PubMed Central journal article supplement (PMC10229431; doi:10.1038/s41589-022-01232-y), 2023-01-19

Uncropped scans of gels from Extended Data Fig. 2

Extended Data Fig. 2b

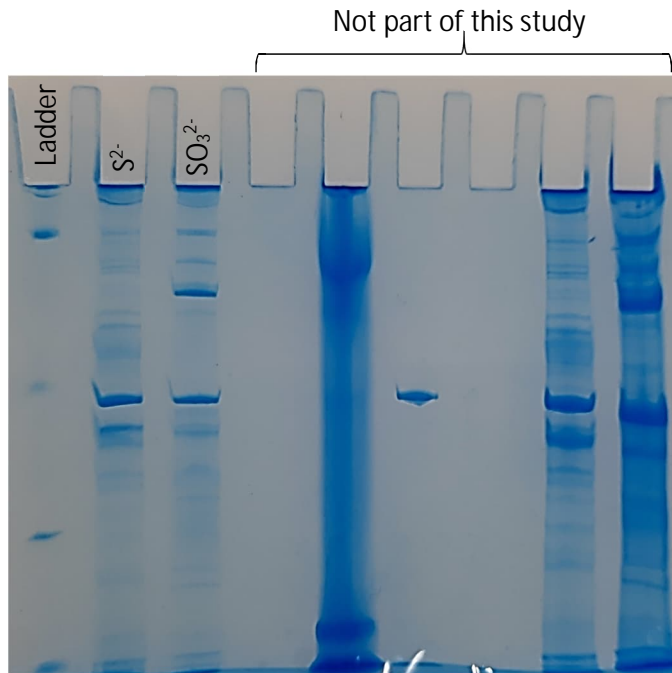

Extended Data Fig. 2c

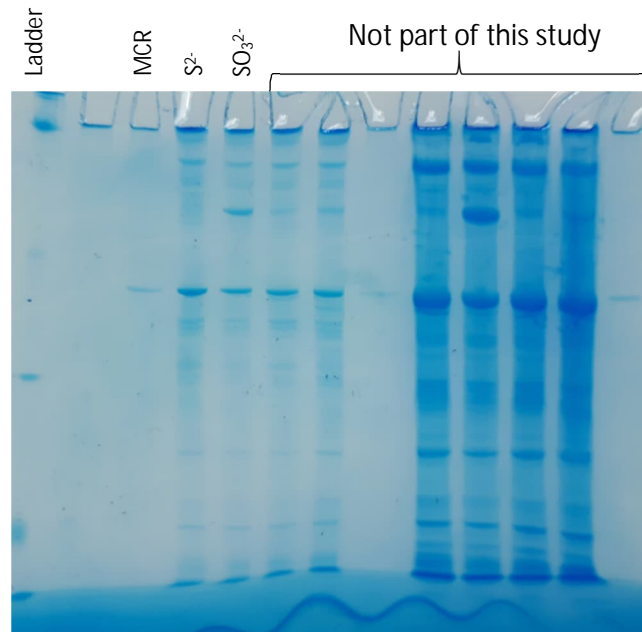

Extended Data Fig. 2d

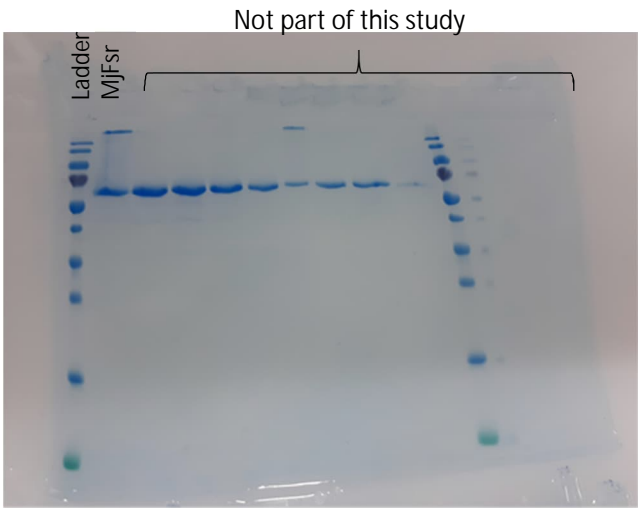

Extended Data Fig. 2e

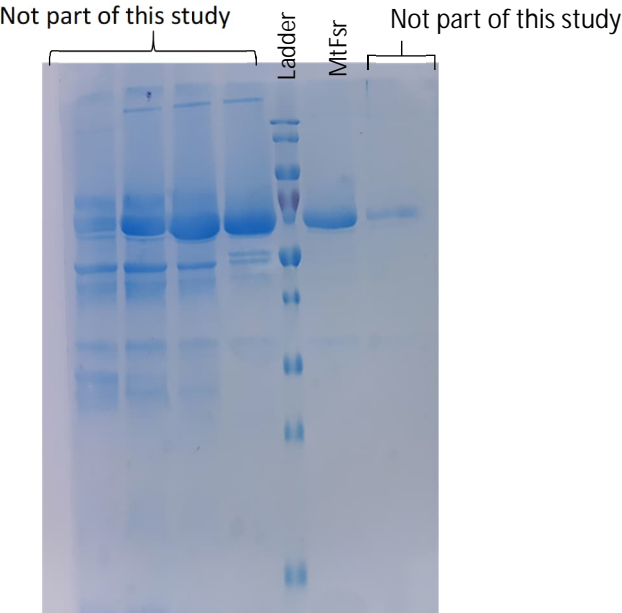

Supplement: 41589_2022_1232_MOESM5_ESM.pdf [file 41589_2022_1232_MOESM5_ESM.pdf]
