# Supplementary material for: Structures of the sulfite detoxifying F420-dependent enzyme from Methanococcales
Source: Nat Chem Biol. 2023 Jan 19;19(6):695–702. doi: 10.1038/s41589-022-01232-y (PMC10229431; doi:10.1038/s41589-022-01232-y)
Supplement: Supplementary file 1 — Supplementary Figs. 1–11 and Table 1. [file 41589_2022_1232_MOESM1_ESM.pdf]

# Structures of the sulfite detoxifying $F_{420}$ -dependent enzyme from *Methanococcales*

In the format provided by the  
authors and unedited

## Table of contents

|                           |            |
|---------------------------|------------|
| 1. Supplementary Fig. 1   | Page 2     |
| 2. Supplementary Fig. 2   | Page 3-4   |
| 3. Supplementary Fig. 3   | Page 5     |
| 4. Supplementary Fig. 4   | Page 6     |
| 5. Supplementary Fig. 5   | Page 7     |
| 6. Supplementary Fig. 6   | Page 8     |
| 7. Supplementary Fig. 7   | Page 9     |
| 8. Supplementary Fig. 8   | Page 10    |
| 9. Supplementary Fig. 9   | Page 11    |
| 10. Supplementary Fig. 10 | Page 12    |
| 11. Supplementary Fig. 11 | Page 13    |
| 12. Supplementary Table 1 | Page 14-15 |

| <div> <div>N-ter</div> <div></div> <div>F<sub>420</sub>H<sub>2</sub>-oxidase</div> <div>Sir</div> <div></div> <div>Sir</div> <div>C-ter</div> </div> |                                   |                             |
|------------------------------------------------------------------------------------------------------------------------------------------------------|-----------------------------------|-----------------------------|
| F <sub>420</sub> -oxidoreductases                                                                                                                    | Sulfite reductases                | Biological function         |
| F <sub>420</sub> -oxidase domain of Fsr Group I and II <sup>1</sup>                                                                                  | Group I Fsr <sup>1</sup>          | detoxification/assimilatory |
| F <sub>420</sub> -reducing [NiFe(Se)]-hydrogenases (FrhB) <sup>2</sup>                                                                               | Group II Fsr <sup>7</sup>         | unknown                     |
| F <sub>420</sub> H <sub>2</sub> :quinone oxidoreductase (FqoF) <sup>3</sup>                                                                          | DsrA <sup>8,9</sup>               | dissimilatory (inactive)    |
| F <sub>420</sub> H <sub>2</sub> :phenazine<br>oxidoreductase (FpoF) <sup>4</sup>                                                                     | DsrB <sup>8,9</sup>               | dissimilatory               |
|                                                                                                                                                      | ArsC <sup>1</sup>                 | dissimilatory               |
| F <sub>420</sub> -dependent glutamate synthase (GOGAT) <sup>5</sup>                                                                                  | alSir/Group I Dsr-LP <sup>5</sup> | assimilatory                |
| Formate dehydrogenase (FdhB) <sup>6</sup>                                                                                                            | Group III Dsr-LP <sup>5</sup>     | unknown                     |
|                                                                                                                                                      | aSir <sup>10,11</sup>             | assimilatory                |

**Supplementary Fig. 1.** Domain affiliations of the F<sub>420</sub>-dependent sulfite reductase (Fsr). Top panel, Fsr domain organization. Its N-terminal half belongs to the F<sub>420</sub>-oxidoreductases (left table) as the F<sub>420</sub>-reducing hydrogenase  $\beta$ -subunit (FrhB), together with the F<sub>420</sub>H<sub>2</sub>:quinone oxidoreductase (FqoF), the F<sub>420</sub>H<sub>2</sub>:phenazine oxidoreductase (FpoF), the putative F<sub>420</sub>-dependent glutamate synthase and formate dehydrogenase (GOGAT and FdhB). Its C-terminal half corresponds to the sulfite reductases (right table). Sulfite reductases are generally classified into assimilatory or dissimilatory. Group I Fsr: Group I F<sub>420</sub>-dependent sulfite reductase, Group II Fsr: Group II F<sub>420</sub>-dependent sulfite reductase, DsrA: dissimilatory sulfite reductase  $\alpha$ -Subunit, DsrB: dissimilatory sulfite reductase  $\beta$ -Subunit, ArsC: anaerobic sulfite reductase subunit C, alSir/Group I Dsr-LP: assimilatory-type low-molecular-weight sulfite reductase/Group I dissimilatory sulfite reductase-like proteins, Group III Dsr-LP: Group III dissimilatory sulfite reductase-like proteins, aSir: assimilatory sulfite reductase. References<sup>1-11</sup> are cited accordingly.

a

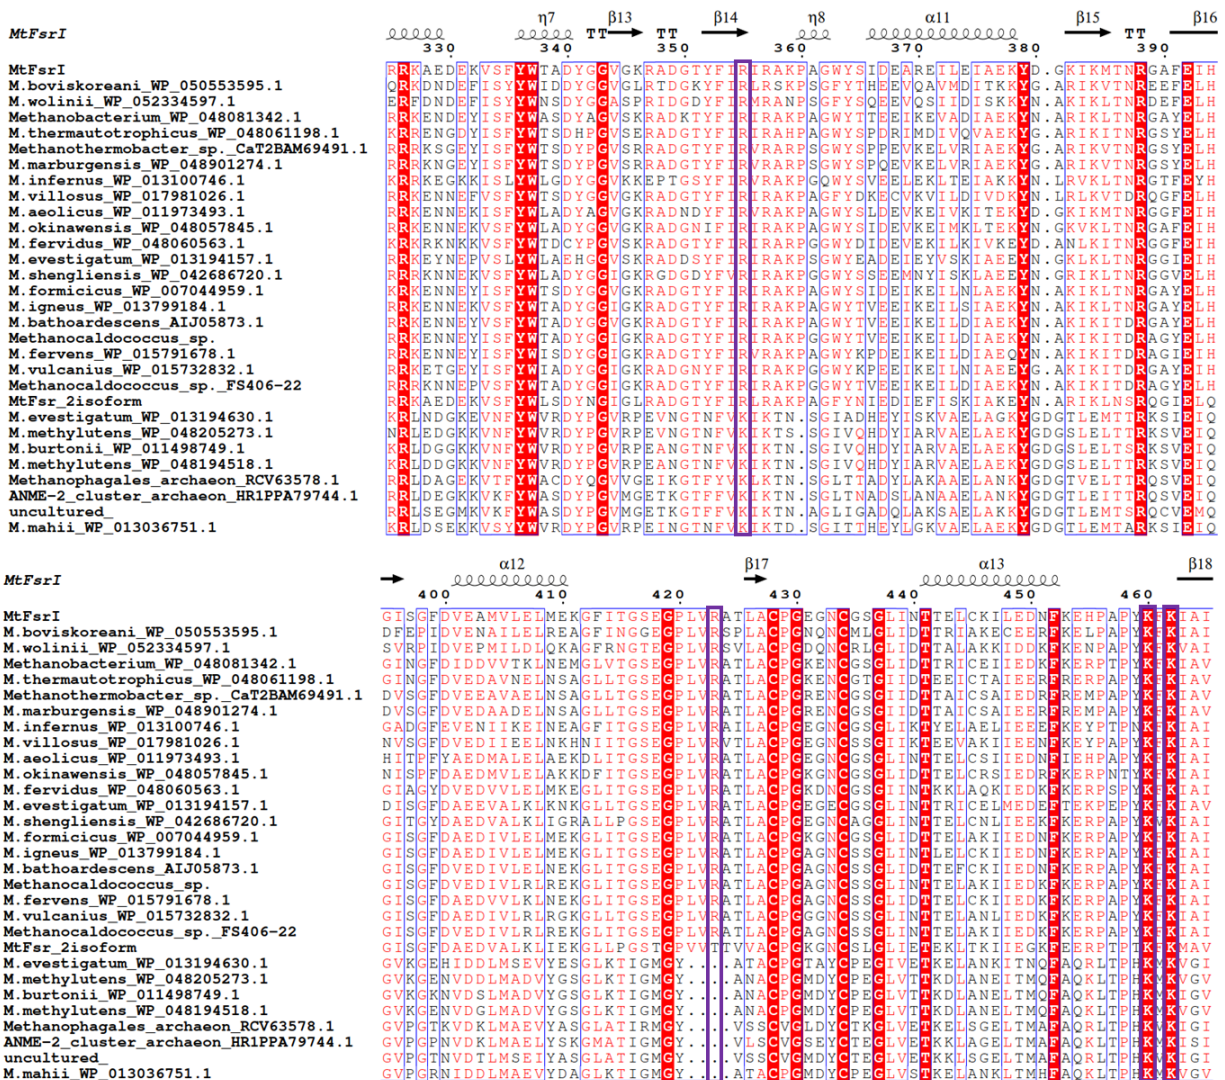

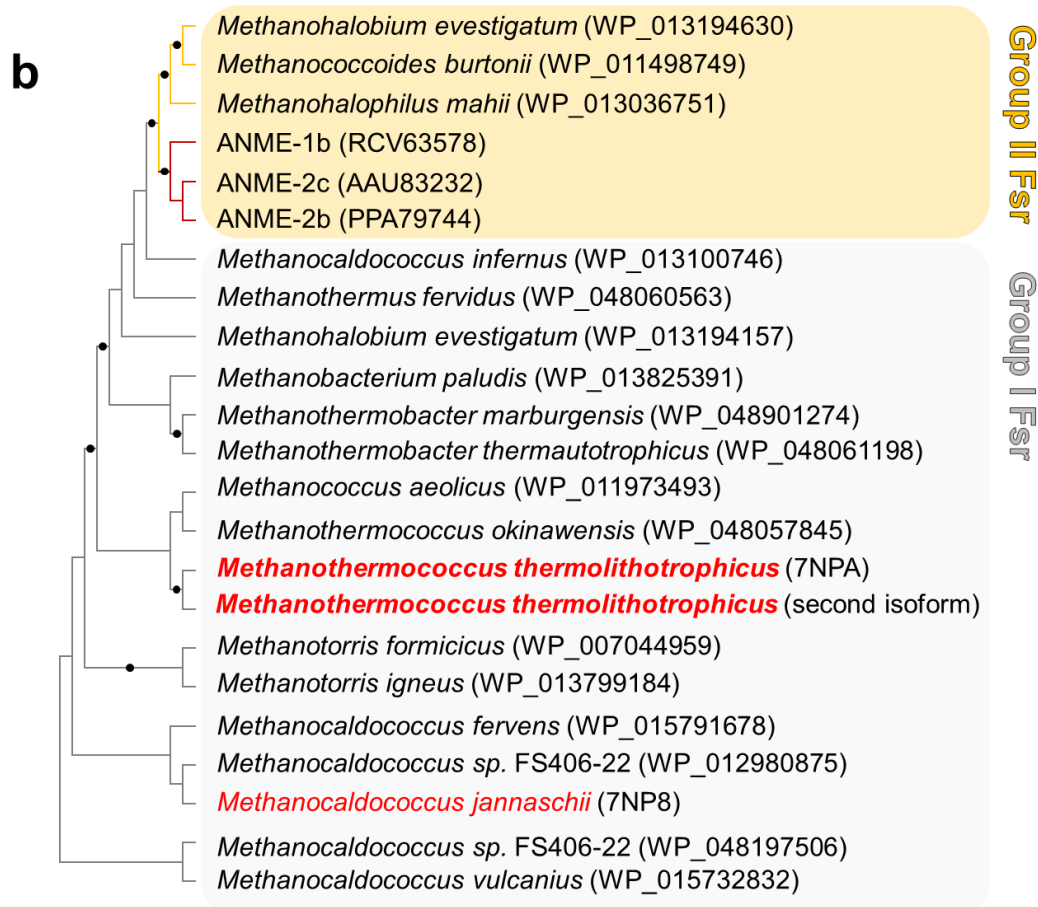

**Supplementary Fig. 2.** Differences between Group I and II Fsr. **a**, Sequence conservation across Group I and II Fsr on a selected stretch from the sulfite reductase domain. Perfectly conserved residues are highlighted with a red background. The purple squares highlight the four perfectly conserved residues across functional sulfite reductases (in *M. thermolithotrophicus*: Arg355, Arg423, Lys460 and Lys462). Sequence alignment was done using Clustal Omega<sup>12</sup>, secondary structure prediction was performed with ESPrnt 3.0<sup>13</sup>. **b**, A neighbor-joining tree was constructed based on the phylogenetic analysis from Yu et al<sup>7</sup>, including the two Fsr sequences from *M. thermolithotrophicus* (in bold red). Protein sequences were obtained from NCBI using BLASTP (E-value cut-off of 1e1), the sequences were then aligned using MUSCLE<sup>14</sup>. Phylogenetic analysis were performed using MEGA11<sup>15</sup>. Protein accession numbers from the NCBI database are shown in parentheses and black dots on the branches represent bootstrap values  $\geq 90$  %.

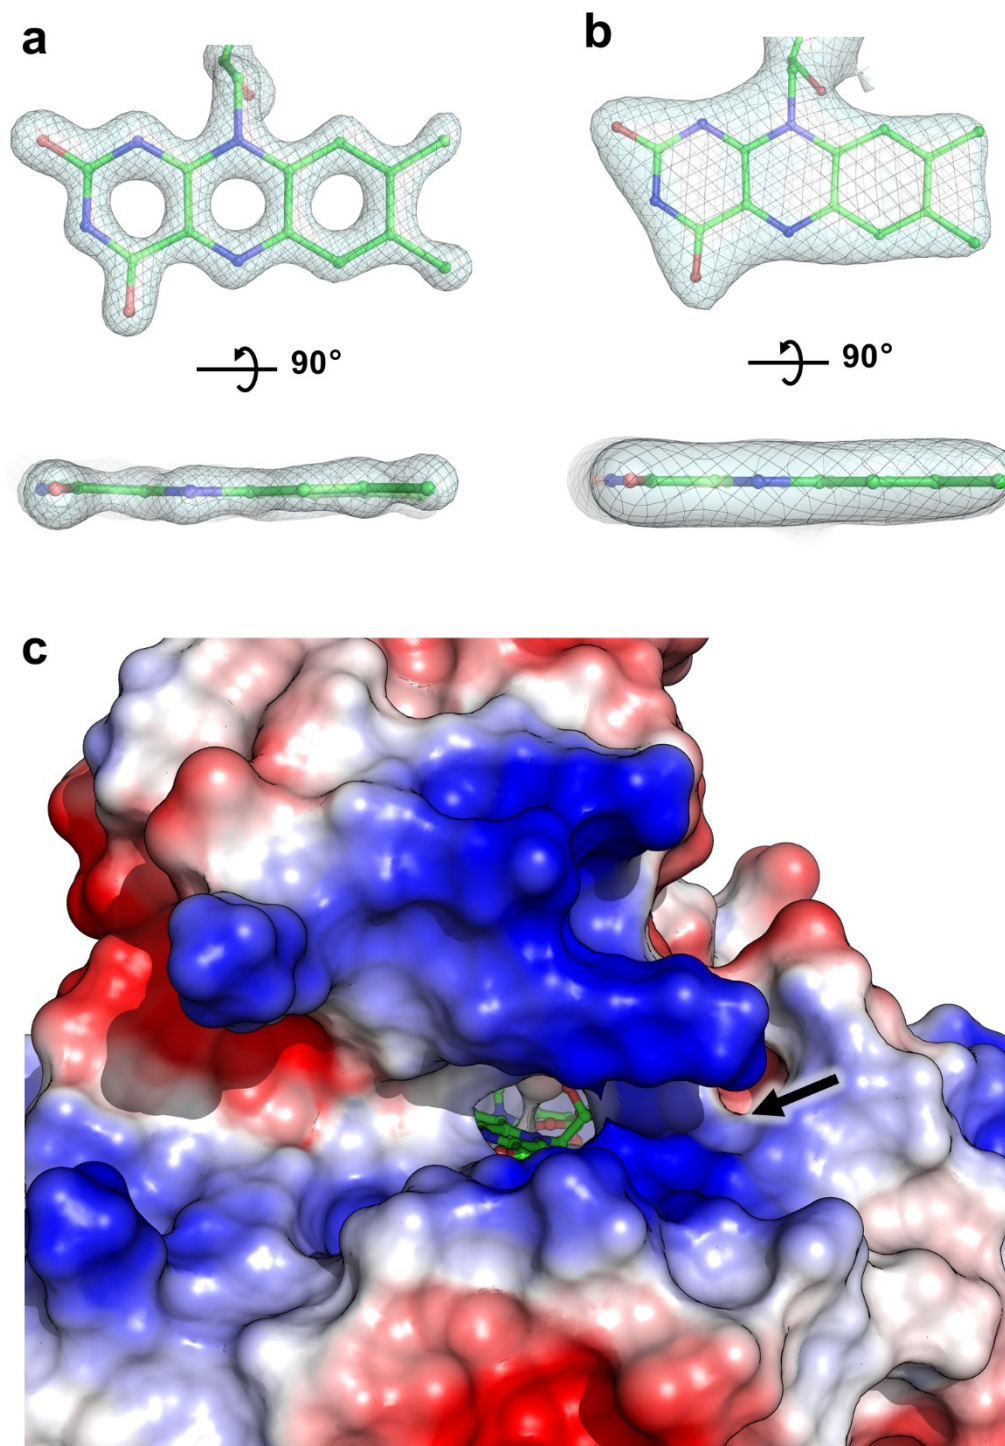

**Supplementary Fig. 3.** The Flavin conformation and F<sub>420</sub> docking site. **a** and **b**, 2F<sub>o</sub>-F<sub>c</sub> map for the FAD in *MtFsr* and *MjFsr* contoured to 3- and 1.5-σ, respectively. The isoalloxazine heterocycle is only slightly bent. **c**, Electrostatic charge profile around the F<sub>420</sub>H<sub>2</sub>-oxidase active site in *MtFsr*. Acidic to basic patches on the surface are coloured in red and blue, respectively. The F<sub>420</sub>H<sub>2</sub> is suspected to bind to the positively charged area (indicated by a black arrow) surrounding the FAD.

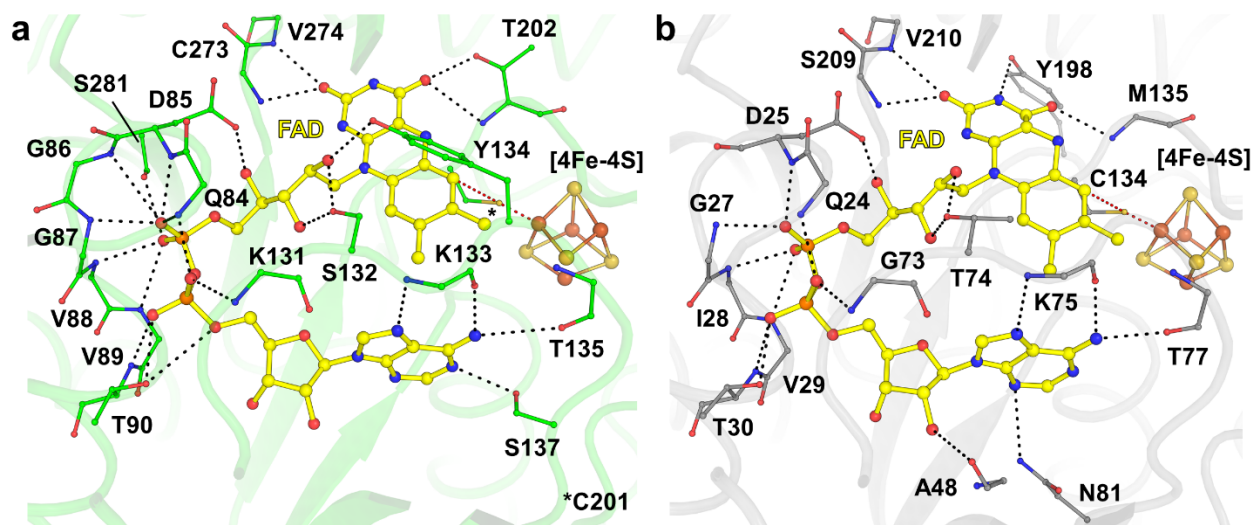

**Supplementary Fig. 4.** Comparison of the FAD binding site of the F<sub>420</sub>H<sub>2</sub>-oxidase domain from *MtFsr* and *FrhB* from *M. marburgensis*. **a**, Close-up of the FAD binding site in the F<sub>420</sub>H<sub>2</sub>-oxidase domain from *MtFsr*. **b**, FAD binding in *FrhB* from *M. marburgensis* (PDB 4OMF). The residues binding the FAD are represented in balls and sticks and hydrogen bonds involved in FAD binding are shown by black dashes. The connection between the [4Fe-4S]-cluster I and the isoalloxazine ring from the FAD, established by a cysteine, are shown by red dashes.

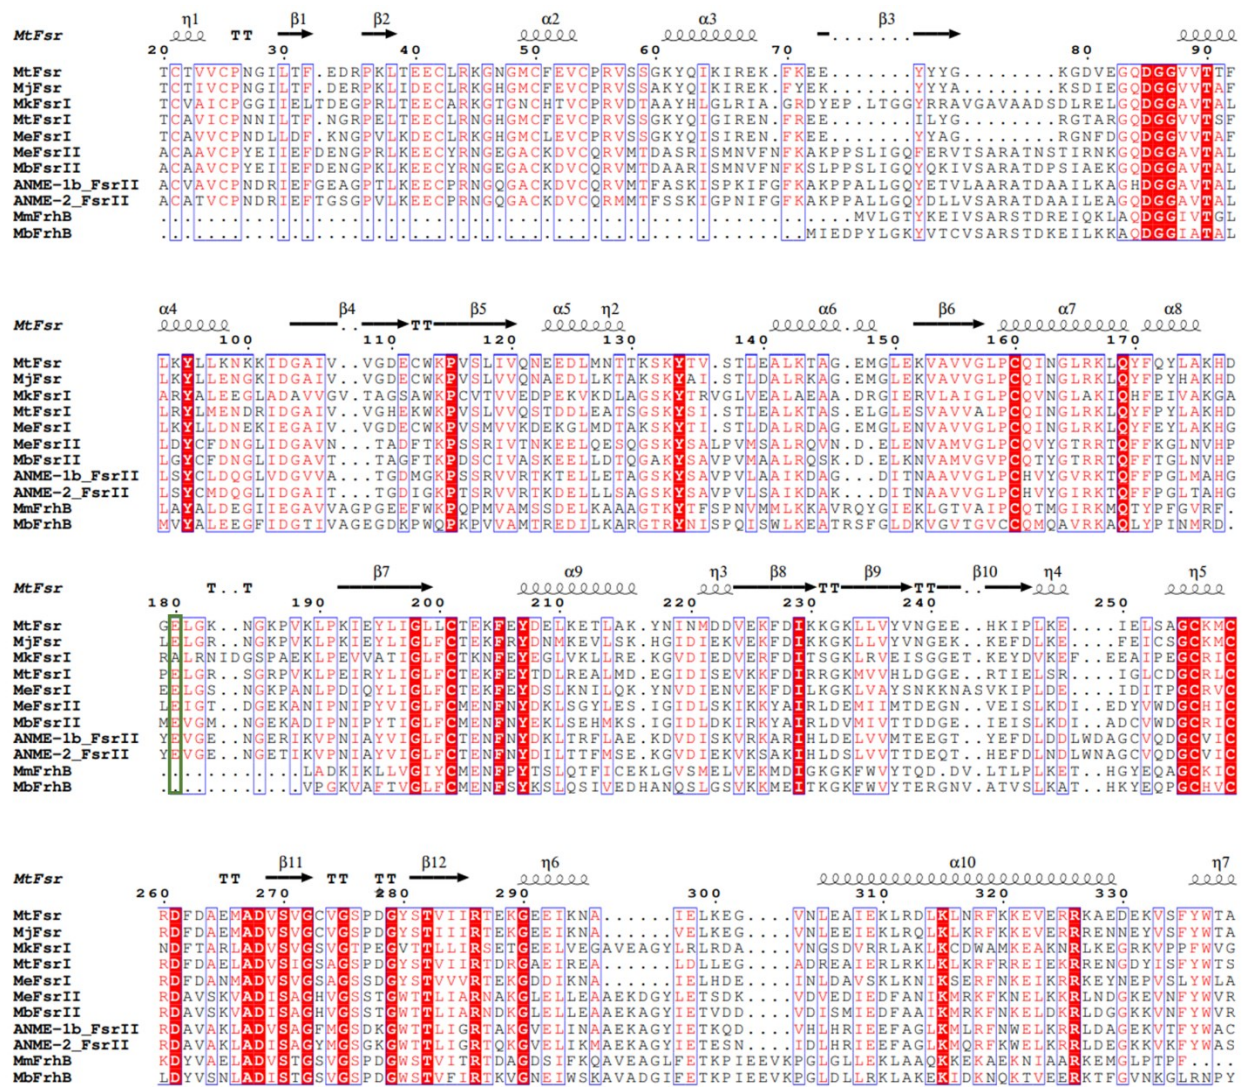

**Supplementary Fig. 5.** Sequence conservation across Group I and II Fsr as well as FrhB. Perfectly conserved residues are highlighted with a red background. The glutamate involved in the [4Fe-4S]-cluster 3 binding is shown by a green square. MtFsr: *M. thermolithotrophicus*, MjFsr: *M. jannaschii* (Q58280.1); MkFsrI: *Methanopyrus kandleri* (WP\_011019168.1); MtFsrI: *Methanothermobacter marburgensis* (ADL58324.1); MeFsrI: *Methanohalobium evestigatum* (WP\_013194157.1); MeFsrII: *Methanohalobium evestigatum* (WP\_013194630.1); MbFsrII: *Methanococcoides burtonii* (WP\_011498749.1); ANME-1b\_FsrII: Fsr from Methanophagales archaeon belonging to ANME-1 cluster (RCV63578.1); ANME-2\_FsrII, Fsr from ANME-2 cluster archaeon HR1 (PPA79744.1); MmFrhB: *Methanothermobacter marburgensis* (ADL59254.1); MbFrhB *Methanosarcina barkeri* (WP\_048177139.1). Sequence alignment was done using Clustal Omega<sup>16</sup>, secondary structure prediction was performed with ESPrnt 3.0<sup>13</sup>.

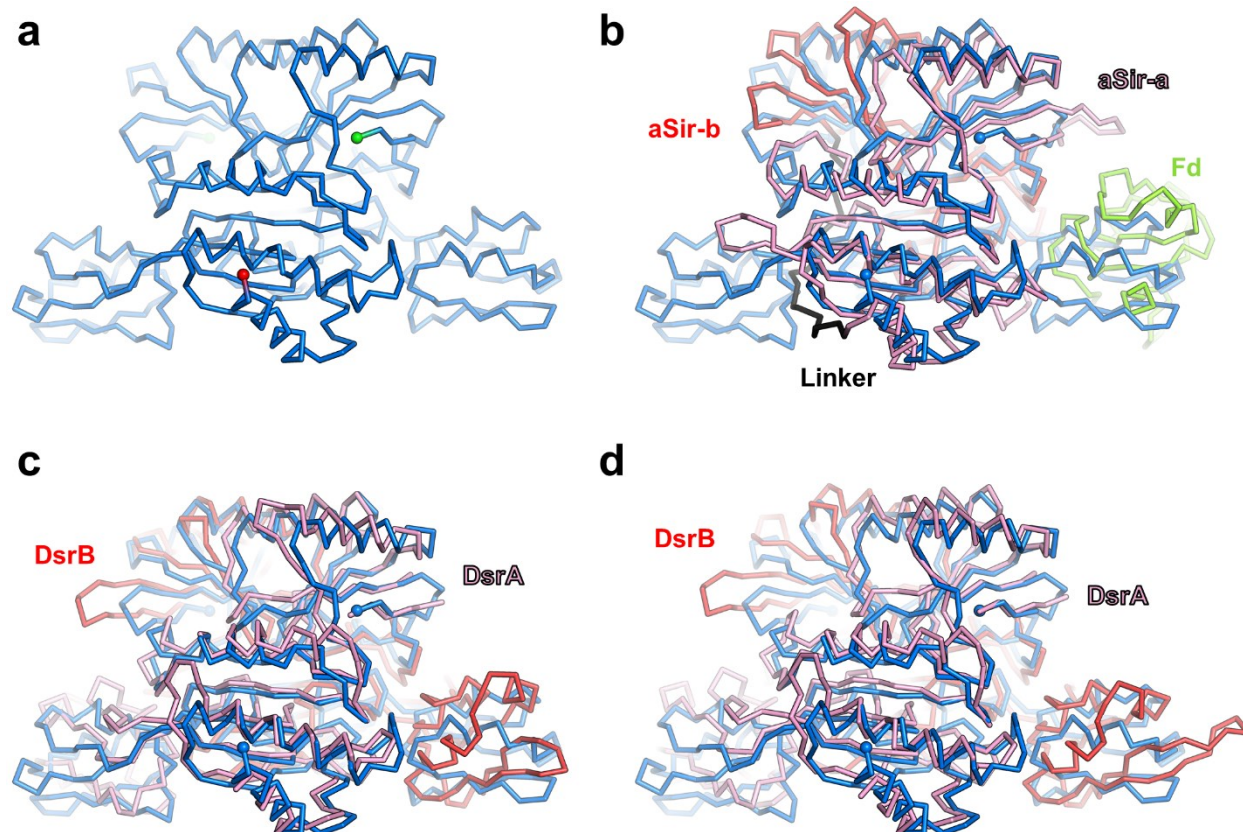

**Supplementary Fig. 6.** Fsr shares the common fold of sulfite reductases. **a**, The dimeric sulfite reductase domains of *MtFsr* with its inserted ferredoxin domains are represented in blue ribbon. N- and C-terminus of the Sir domain are shown in green and red spheres, respectively. **b**, Overall superposition of dimeric *MtFsr* (blue) with the aSir from *Zea mays* (PDB 5H92, whole chain rmsd=2.434 Å for 142-C $\alpha$  aligned and a rmsd=0.964 Å for the most conserved region with 47-C $\alpha$  aligned). The aSir-a part from *Zea mays* is coloured in light pink, and the aSir-b part is coloured in red. **c**, Overall superposition of dimeric *MtFsr* with DsrAB (DsrA in pink, DsrB in red) from *Archaeoglobus fulgidus* (PDB 3MM5, whole chain rmsd=4.152 Å for 225-C $\alpha$  aligned and an rmsd=0.921 Å with 53-C $\alpha$  aligned for the most conserved region on one *MtFsr* monomer). **d**, Overall superposition of dimeric *MtFsr* with DsrAB (DsrA in pink, DsrB in red) from *Desulfovibrio vulgaris* (PDB 2V4J, whole chain rmsd=2.819 Å for 157-C $\alpha$  aligned and a rmsd=0.961 Å with 51-C $\alpha$  aligned for the most conserved region on one *MtFsr* monomer). b-d, The extensions contained in aSir and DsrAB which are not common to Fsr have been removed for clarity.

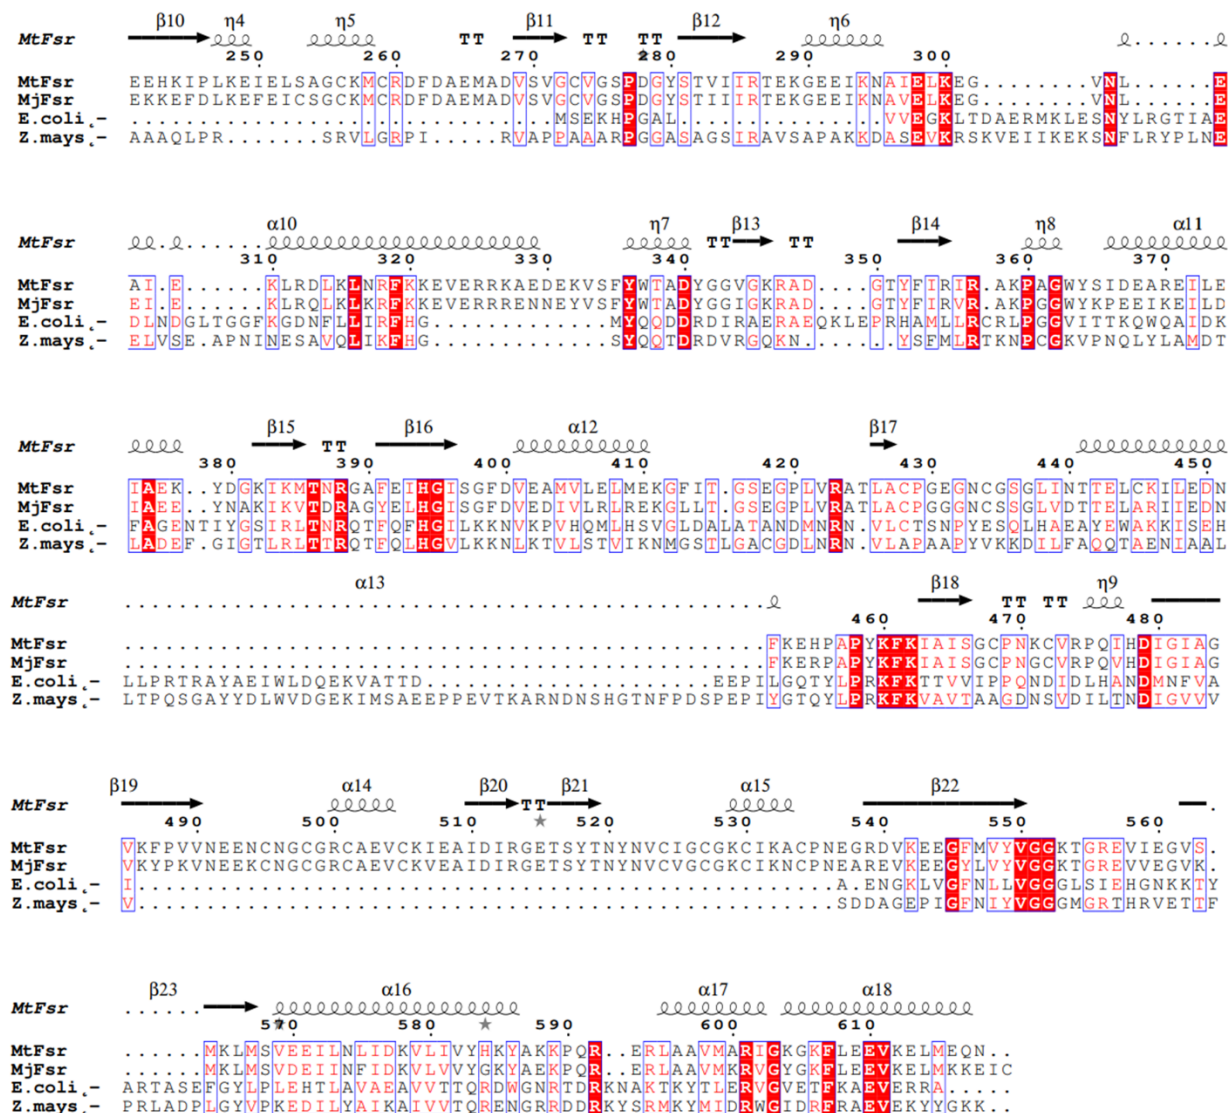

**Supplementary Fig. 7.** Sequence conservation across the C-terminal half of Fsr (MtFsr: 241-618) and aSir-a. Perfectly conserved residues are highlighted with a red background. MtFsr: *M. thermolithotrophicus*; MjFsr: *M. jannaschii*; Z.mays: *Zea mays* (PDB 5H92, for residues: 1-392); E.coli: *Escherichia coli* (PDB 2GEP, for residues: 1-327). Sequence alignment was done using Clustal Omega<sup>16</sup>, secondary structure representation was performed with ESPrpt 3.0<sup>13</sup>. Arg355 seems not conserved in *E. coli* and *Z. mays* due to a shift of 2 residues in the alignment.

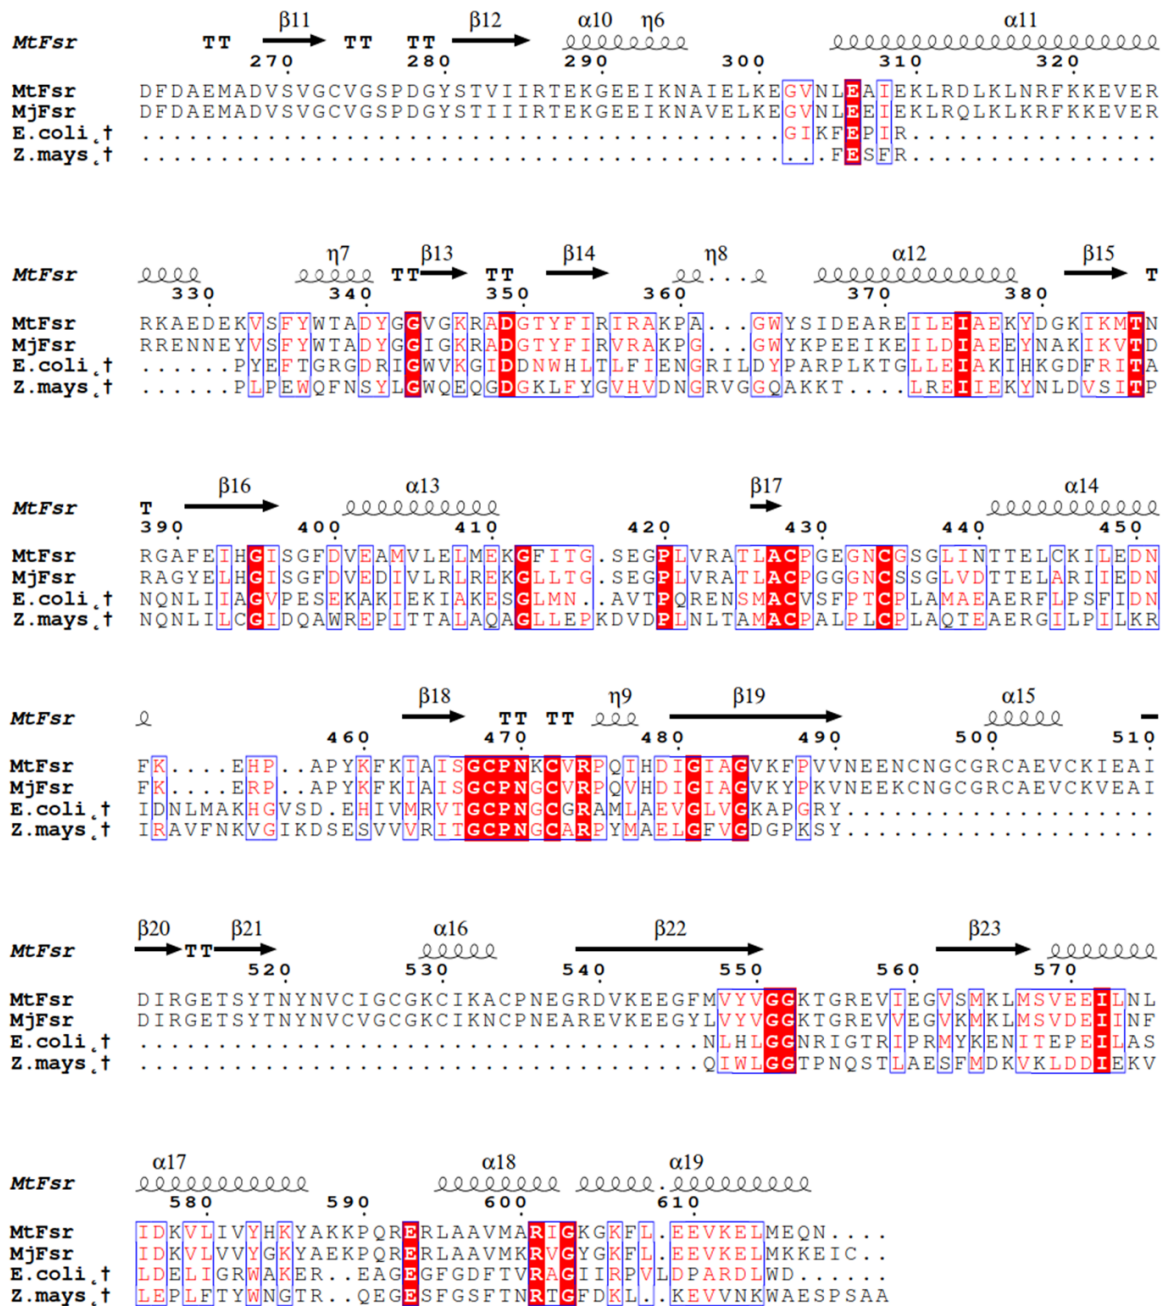

**Supplementary Fig. 8.** Sequence conservation across the C-terminal half of Fsr (*MtFsr*: 261-618) and aSir-b. Perfectly conserved residues are highlighted with a red background. *MtFsr*: *M. thermolithotrophicus*; *MjFsr*: *M. jannaschii*; *Z. mays*: *Zea mays* (PDB 5H92, used residues: 393-653); *E.coli*: *Escherichia coli* (PDB 2GEP, shown residues: 328-570). Sequence alignment was done using Clustal Omega<sup>16</sup>, secondary structure representation was performed with ESPrnt 3.0<sup>13</sup>.

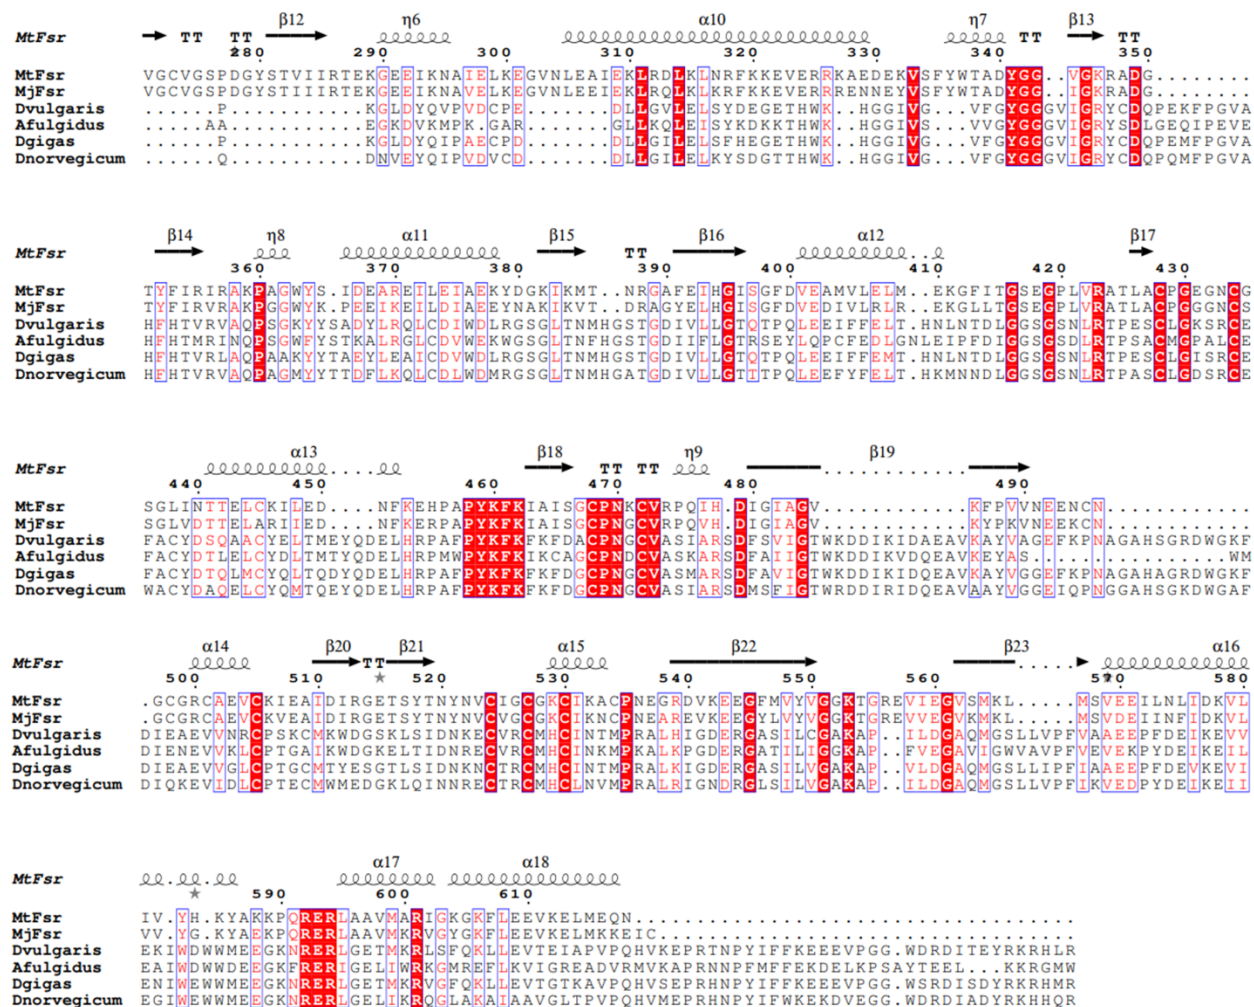

**Supplementary Fig. 9.** Sequence conservation across the C-terminal half of Fsr (MtFsr: 271-618) and DsrA. Perfectly conserved residues are highlighted with a red background. MtFsr: *M. thermolithotrophicus*; MjFsr: *M. jannaschii*. Dvulgaris: *D. vulgaris* (PDB 2V4J); Afulgidus: *Archaeoglobus fulgidus* (PDB 3MM5); Dgigas: *Desulfovibrio gigas* (PDB 3OR1); Dnorvegicum: *Desulfomicrobium norvegicum* (PDB 2XSJ). Sequence alignment was done using Clustal Omega<sup>16</sup>, secondary structure representation was performed with ESPrpt 3.0<sup>13</sup>. Arg355 seems not conserved due to a shift of one residue.

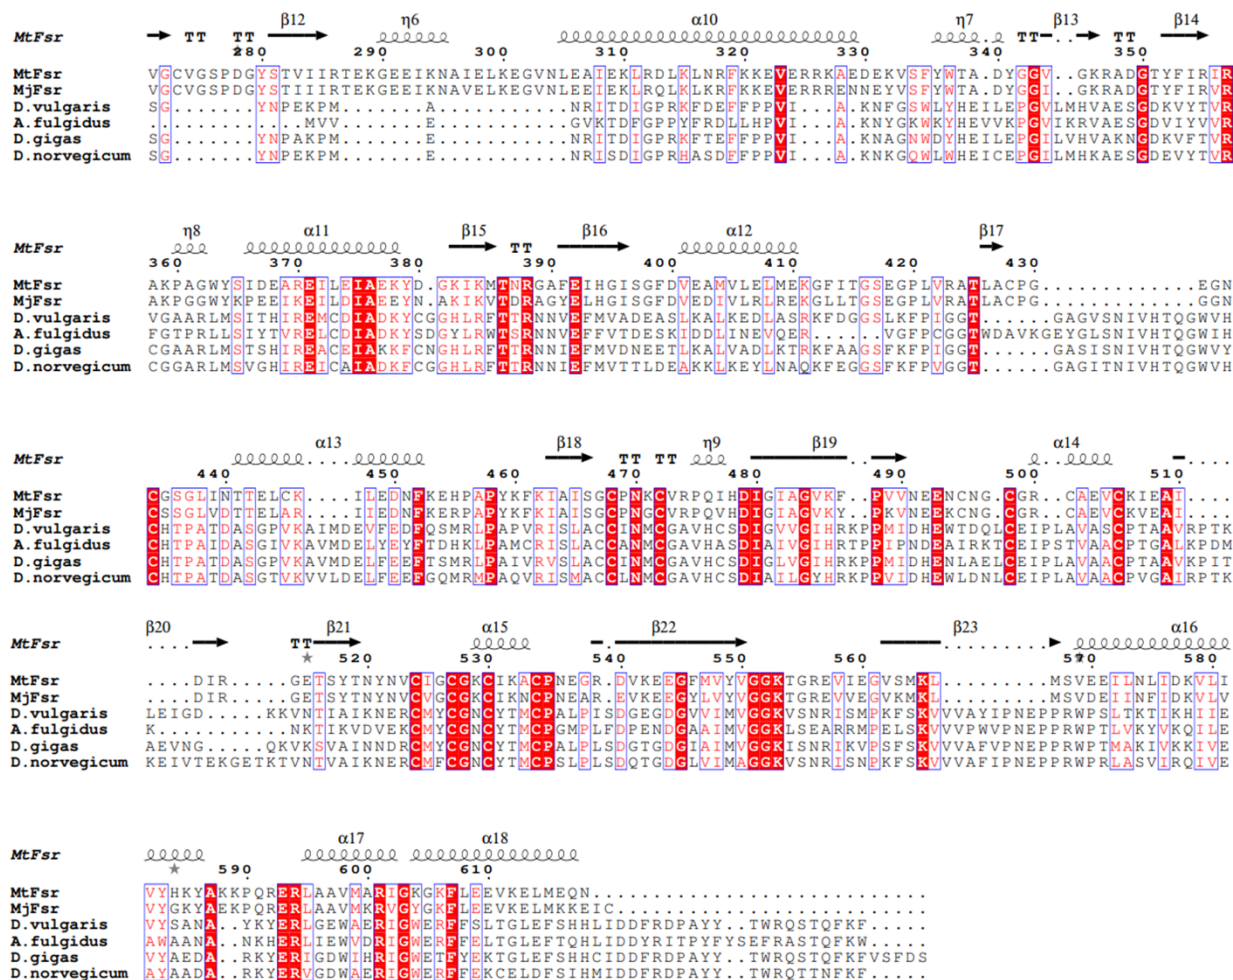

**Supplementary Fig. 10.** Sequence conservation across the C-terminal half of Fsr (MtFsr: 271-618) and DsrB. Perfectly conserved residues are highlighted with a red background. MtFsr: *M. thermolithotrophicus*; MjFsr: *M. jannaschii*. D.vulgaris: *Desulfovibrio vulgaris* (PDB 2V4J); A.fulgidus: *Archaeoglobus fulgidus* (PDB 3MM5); D.gigas: *Desulfovibrio gigas* (PDB 3OR1); D.norvegicum: *Desulfomicrobium norvegicum* (PDB 2XSJ). Sequence alignment was done using Clustal Omega<sup>16</sup>, secondary structure representation was performed with ESPript 3.0<sup>13</sup>. Arg355 seems not conserved in *A. fulgidus*, *D. vulgaris* and *D. norvegicum* due to a shift of two residues.

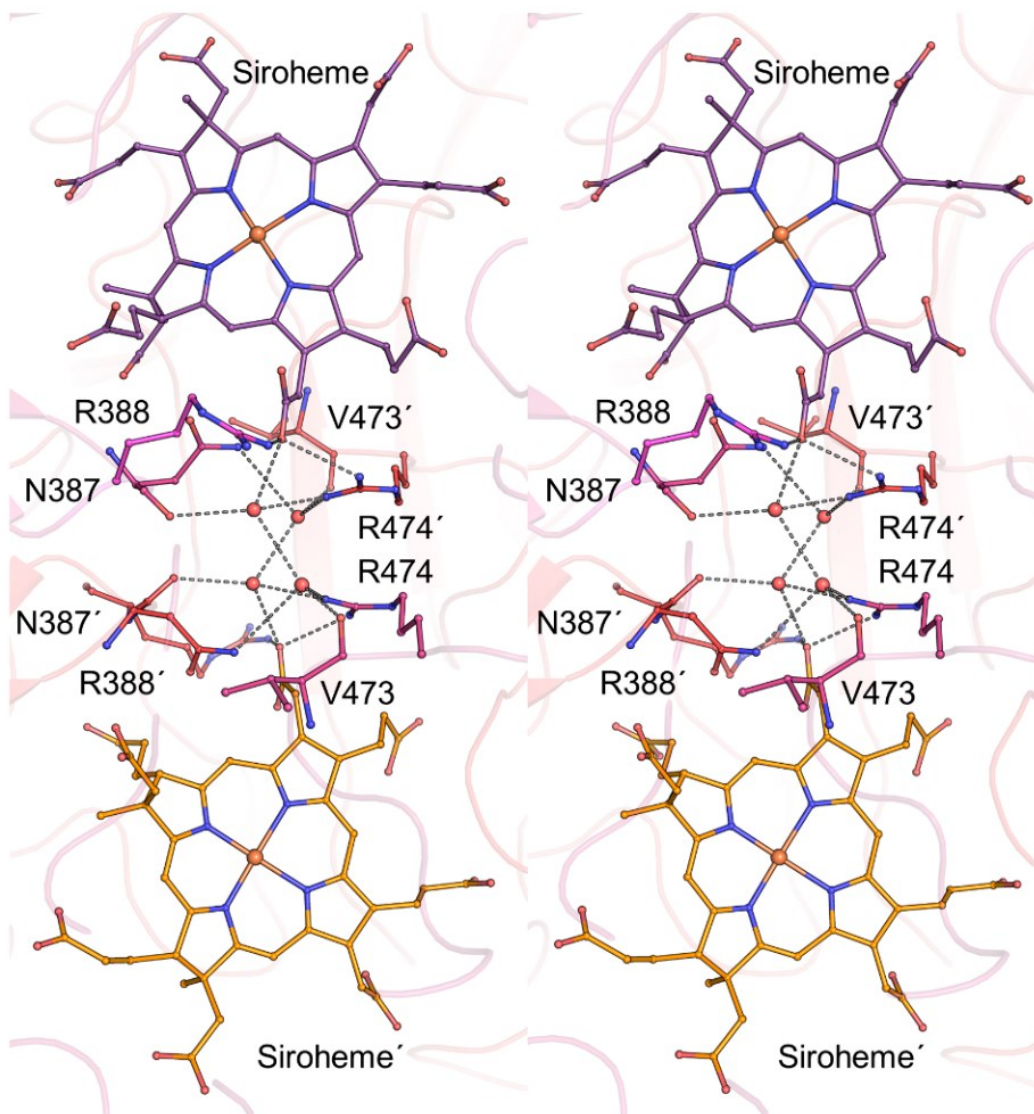

**Supplementary Fig. 11.** Stereo view of the intra-dimeric sirohemes in *MtFsr*, in which each chain is differently coloured. Primed labels indicate residues belonging to the dimeric partner. Sirohemes, water and residues involved in the channel are represented as balls and sticks. The distance between the two closest siroheme carboxylate groups is 9.4 Å. This close contact would theoretically allow an internal electron transfer between both sirohemes.

**Supplementary Table 1.** Chemical list of reagents used in this article.

| Compound                                              | Company       | Catalog number  |
|-------------------------------------------------------|---------------|-----------------|
| Gas mixture N <sub>2</sub> /H <sub>2</sub> , 95:5     | Air Liquide   | ARCAL F5        |
| Potassium ferricyanide                                | Sigma Aldrich | 244023          |
| Tris ultrapure                                        | AppliChem     | A1086           |
| Methylene blue hydrate                                | Sigma Aldrich | 66720           |
| Resorufin                                             | Sigma Aldrich | 73144           |
| Indigo carmine                                        | Sigma Aldrich | 131164          |
| 2-Hydroxy-1,4-naphthochinon                           | Sigma Aldrich | H46805          |
| Sodium anthraquinone-2-sulfonate                      | Sigma Aldrich | 123242          |
| Phenosafranin                                         | Sigma Aldrich | 199648          |
| Safranin T                                            | Sigma Aldrich | S8884           |
| Neutral red                                           | Sigma Aldrich | N4638           |
| Benzylviologen                                        | Sigma Aldrich | 271845          |
| Methylviologen dichloride hydrate                     | Sigma Aldrich | 856177          |
| PD10 desalting (Sephadex GH-25)                       | Cytiva        | 17085101        |
| Sodium sulfite                                        | Sigma Aldrich | S4672           |
| Copper (II) sulfate pentahydrate                      | Sigma Aldrich | 209198          |
| Disodium EDTA                                         | AppliChem     | 131669          |
| KCl                                                   | Roth          | 6781.1          |
| NaCl                                                  | Roth          | 3957.1          |
| NaHCO <sub>3</sub>                                    | Roth          | 6885.1          |
| CaCl <sub>2</sub> · 2 H <sub>2</sub> O                | Roth/Merck    | 5239.1/1.02382. |
| MgCl <sub>2</sub> · 6 H <sub>2</sub> O                | Roth          | 2189.1          |
| NH <sub>4</sub> Cl                                    | Merck         | 1,011,451,000   |
| Nitrilotriacetic acid                                 | Sigma Aldrich | 72560           |
| FeCl <sub>2</sub> · 4 H <sub>2</sub> O                | Sigma Aldrich | 380024          |
| Na <sub>2</sub> SeO <sub>3</sub> · 5 H <sub>2</sub> O | Merck         | 1.06607         |
| Na <sub>2</sub> WO <sub>4</sub> · 2 H <sub>2</sub> O  | Merck         | 1,066,730,250   |
| Na <sub>2</sub> MoO <sub>4</sub> · 2 H <sub>2</sub> O | Merck         | 1065210100      |
| Resazurin Sodium Salt                                 | Sigma         | R7017           |
| PIPES                                                 | Roth          | 9156.4          |
| Sodium hydroxide pellets                              | Applichem     | AP131687-1211   |
| Tris Hydrochlorid                                     | Roth          | 9090.3          |
| MES                                                   | Roth          | 4259.4          |
| MnCl <sub>2</sub> · 4 H <sub>2</sub> O                | Roth          | T881.3          |
| FeCl <sub>3</sub> · 6 H <sub>2</sub> O                | Fluka         | 44944           |
| CaCl <sub>2</sub> · 2 H <sub>2</sub> O                | Roth/Merck    | 5239.1/1.02382. |
| CoCl <sub>2</sub> · 6 H <sub>2</sub> O                | Roth          | T889.2          |

|                                        |                 |               |
|----------------------------------------|-----------------|---------------|
| ZnCl <sub>2</sub>                      | Merck           | 1,088,160,250 |
| NiCl <sub>2</sub> · 6 H <sub>2</sub> O | Sigma Aldrich   | 654507        |
| VCl <sub>3</sub>                       | Sigma Aldrich   | 208272        |
| Sodium sulfite                         | Sigma Aldrich   | 71988         |
| Sodium sulfate                         | Sigma Aldrich   | 1.06649       |
| Sodium sulfide                         | Sigma Aldrich   | 407410        |
| 1.4-dithiothreitol                     | Neolab/BioFroxx | 1111GR100     |
| Bradford (Bio-Rad-Protein Assay)       | Thermo Fisher   | 23246         |
| Tris Hydrochlorid                      | Roth            | 9090.3        |
| Ammoniumsulfate                        | Merck Applichem | 1.01211       |
| Glycerol                               | Applichem       | 141339.1211   |
| di-Potassium hydrogen phosphate        | Roth            | P749.2        |
| Potassium dihydrogen phosphate         | Roth            | 3904.1        |
| Ammoniumhydrogencarbonat               | Roth            | T871.1        |
| Tris                                   | Serva           | 37181.02      |
| Sodium borohydride                     | Sigma Aldrich   | 452882        |
| HCl, 25%                               | Sigma Aldrich   | 100316        |
| Tricine                                | Roth            | 6977.3        |
| Bis-Tris                               | Roth            | 9140          |
| Sodium deoxycholate                    | Fluka           | 30970         |
| Dodecyl maltoside                      | Roth            | CN26.2        |
| Trypsin from bovine pancreas           | Sigma Aldrich   | T8003         |
| Sodium nitrite                         | Sigma Aldrich   | 563218        |

## References

- 1 Johnson, E. F. & Mukhopadhyay, B. A new type of sulfite reductase, a novel coenzyme F<sub>420</sub>-dependent enzyme, from the methanarchaeon *Methanocaldococcus jannaschii*. *J Biol Chem* **280**, 38776-38786, doi:10.1074/jbc.M503492200 (2005).
- 2 Vitt, S. *et al.* The F<sub>420</sub>-reducing [NiFe]-hydrogenase complex from *Methanothermobacter marburgensis*, the first X-ray structure of a Group 3 family member. *Journal of Molecular Biology* **426**, 2813-2826, doi:10.1016/j.jmb.2014.05.024 (2014).
- 3 Brüggemann, H., Falinski, F. & Deppenmeier, U. Structure of the F<sub>420</sub>H<sub>2</sub>:quinone oxidoreductase of *Archaeoglobus fulgidus* identification and overproduction of the F<sub>420</sub>H<sub>2</sub>-oxidizing subunit. *Eur J Biochem* **267**, 5810-5814, doi:10.1046/j.1432-1327.2000.01657.x (2000).
- 4 Bäumer, S. *et al.* The F<sub>420</sub>H<sub>2</sub>:heterodisulfide oxidoreductase system from *Methanosarcina* species. 2-Hydroxyphenazine mediates electron transfer from F<sub>420</sub>H<sub>2</sub> dehydrogenase to heterodisulfide reductase. *Febs Lett* **428**, 295-298, doi:10.1016/s0014-5793(98)00555-9 (1998).
- 5 Susanti, D. & Mukhopadhyay, B. An intertwined evolutionary history of methanogenic archaea and sulfate reduction. *Plos One* **7**, doi:ARTN e4531310.1371/journal.pone.0045313 (2012).
- 6 Raaijmakers, H. *et al.* Gene Sequence and the 1.8 Å Crystal Structure of the Tungsten-Containing Formate Dehydrogenase from *Desulfovibrio gigas*. *Structure* **10**, 1261-1272, doi:https://doi.org/10.1016/S0969-2126(02)00826-2 (2002).
- 7 Yu, H. *et al.* Comparative genomics and proteomic analysis of assimilatory sulfate reduction pathways in anaerobic methanotrophic archaea. *Front Microbiol* **9**, 2917, doi:10.3389/fmicb.2018.02917 (2018).
- 8 Crane, B. R. & Getzoff, E. D. The relationship between structure and function for the sulfite reductases. *Curr Opin Struc Biol* **6**, 744-756, doi:Doi 10.1016/S0959-440x(96)80003-0 (1996).
- 9 Dhillon, A., Goswami, S., Riley, M., Teske, A. & Sogin, M. Domain evolution and functional diversification of sulfite reductases. *Astrobiology* **5**, 18-29, doi:10.1089/ast.2005.5.18 (2005).
- 10 Kim, J. Y., Nakayama, M., Toyota, H., Kurisu, G. & Hase, T. Structural and mutational studies of an electron transfer complex of maize sulfite reductase and ferredoxin. *J Biochem* **160**, 101-109, doi:10.1093/jb/mvw016 (2016).
- 11 Yoshimoto, A. & Sato, R. Studies on yeast sulfite reductase. I. Purification and characterization. *Biochim Biophys Acta* **153**, 555-575, doi:10.1016/0005-2728(68)90185-0 (1968).
- 12 Sievers, F. *et al.* Fast, scalable generation of high-quality protein multiple sequence alignments using Clustal Omega. *Mol Syst Biol* **7**, 539, doi:10.1038/msb.2011.75 (2011).
- 13 Robert, X. & Gouet, P. Deciphering key features in protein structures with the new ENDscript server. *Nucleic Acids Res* **42**, W320-324, doi:10.1093/nar/gku316 (2014).

- 14 Edgar, R. C. MUSCLE: a multiple sequence alignment method with reduced time and space complexity. *BMC Bioinformatics* **5**, 113, doi:10.1186/1471-2105-5-113 (2004).
- 15 Tamura, K., Stecher, G. & Kumar, S. MEGA11: Molecular evolutionary genetics analysis version 11. *Mol Biol Evol* **38**, 3022-3027, doi:10.1093/molbev/msab120 (2021).
- 16 Sievers, F. *et al.* Fast, scalable generation of high-quality protein multiple sequence alignments using Clustal Omega. *Molecular Systems Biology* **7**, doi:ARTN 53910.1038/msb.2011.75 (2011).
